# Supplementary material for: Actionable gene-based classification toward precision medicine in gastric cancer
Source: Genome Med. 2017 Oct 31;9:93. doi: 10.1186/s13073-017-0484-3 (PMC5664811; doi:10.1186/s13073-017-0484-3)
Supplement: Supplementary file 2 — Detail of the 435-gene panel. (XLSX 16 kb) [file 13073_2017_484_MOESM2_ESM.xlsx]

## Sheet: Table S2
	Table S2. Detail of 435 gene panel.
	No.	Gene Symbol	No.	Gene Symbol	No.	Gene Symbol	No.	Gene Symbol	No.	Gene Symbol	No.	Gene Symbol	No.	Gene Symbol	No.	Gene Symbol	No.	Gene Symbol	No.	Gene Symbol	No.	Gene Symbol
	1	ABL1	41	BMPR1A	81	CDKN2A	121	ERBB3	161	GNA11	201	KIAA1804	241	MN1	281	PAX8	321	PTGS2	361	SETDB1	401	TNFAIP3
	2	ABL2	42	BRAF	82	CDKN2B	122	ERBB4	162	GNA13	202	KISS1R	242	MRE11A	282	PBRM1	322	PTK2	362	SF3B1	402	TNFRSF14
	3	ACVR1B	43	BRCA1	83	CDKN2C	123	ERG	163	GNAQ	203	KIT	243	MSH2	283	PBX1	323	PTPN11	363	SGK1	403	TNFRSF4
	4	ACVR2A	44	BRCA2	84	CHD2	124	ERRFI1	164	GNAS	204	KLF5	244	MSH6	284	PDCD1	324	PTPRD	364	SH2D1A	404	TNK2
	5	ADGRA2	45	BRD4	85	CHD4	125	ESR1	165	GRIN2A	205	KLF6	245	MST1R	285	PDCD1LG2	325	PTPRT	365	SLIT2	405	TOP1
	6	AKT1	46	BRIP1	86	CHEK1	126	ETS1	166	GRM3	206	KLHL6	246	MTOR	286	PDGFRA	326	PXDNL	366	SLIT3	406	TOP2A
	7	AKT2	47	BTG1	87	CHEK2	127	ETV1	167	GSK3B	207	KMT2A	247	MTR	287	PDGFRB	327	QKI	367	SMAD2	407	TP53
	8	AKT3	48	BTK	88	CIC	128	ETV4	168	HDAC1	208	KMT2C	248	MTRR	288	PDK1	328	RAC1	368	SMAD3	408	TP63
	9	ALK	49	BUB1B	89	CREBBP	129	ETV5	169	HDAC2	209	KMT2D	249	MUTYH	289	PGAP3	329	RAD17	369	SMAD4	409	TPR
	10	AMER1	50	CARD11	90	CRKL	130	ETV6	170	HGF	210	KRAS	250	MYC	290	PIK3C2A	330	RAD50	370	SMARCA4	410	TPX2
	11	APC	51	CBFB	91	CRTC1	131	EZH2	171	HIF1A	211	LIG3	251	MYCL	291	PIK3C2B	331	RAD51	371	SMARCB1	411	TRIM33
	12	AR	52	CBL	92	CSF1R	132	FANCA	172	HNF1A	212	LMO1	252	MYCN	292	PIK3C2G	332	RAD51C	372	SMO	412	TRRAP
	13	ARAF	53	CCND1	93	CTCF	133	FANCB	173	HNF4A	213	LPP	253	MYD88	293	PIK3CA	333	RAD51D	373	SOS1	413	TSC1
	14	ARID1A	54	CCND2	94	CTLA4	134	FANCC	174	HRAS	214	LYN	254	NBN	294	PIK3CB	334	RAF1	374	SOX10	414	TSC2
	15	ARID1B	55	CCND3	95	CTNNA1	135	FANCD2	175	HSP90AA1	215	LZTR1	255	NCOA1	295	PIK3CD	335	RALGDS	375	SOX11	415	TSHR
	16	ARID2	56	CCNE1	96	CTNNA2	136	FANCE	176	HSP90AB1	216	MAGI2	256	NCOA2	296	PIK3CG	336	RASA1	376	SOX2	416	TYMS
	17	ARID5B	57	CCR4	97	CTNNB1	137	FANCF	177	ICK	217	MAGI3	257	NF1	297	PIK3R1	337	RB1	377	SOX9	417	U2AF1
	18	ASXL1	58	CD274	98	CUL3	138	FANCG	178	IDH1	218	MALT1	258	NF2	298	PIK3R2	338	RBM10	378	SPEN	418	UBR5
	19	ATM	59	CD276	99	CUX1	139	FANCL	179	IDH2	219	MAML2	259	NFE2L2	299	PIK3R3	339	REL	379	SPOP	419	USP9X
	20	ATR	60	CD40	100	CYLD	140	FAT1	180	IGF1R	220	MAP2K1	260	NFKB1	300	PLAG1	340	RET	380	SRC	420	VHL
	21	ATRX	61	CD79A	101	DAXX	141	FBXW7	181	IGF2	221	MAP2K2	261	NFKB2	301	PLCG1	341	RHEB	381	SSTR1	421	VTCN1
	22	AURKA	62	CD79B	102	DCLRE1C	142	FGFR1	182	IGF2R	222	MAP2K4	262	NFKBIA	302	PLCG2	342	RHOA	382	SSTR2	422	WEE1
	23	AURKB	63	CD80	103	DDR1	143	FGFR2	183	IKBKB	223	MAP3K1	263	NKX2-1	303	PLK1	343	RICTOR	383	SSTR3	423	WISP3
	24	AURKC	64	CD86	104	DDR2	144	FGFR3	184	IKBKE	224	MAP3K7	264	NOTCH1	304	PMS1	344	RNASEL	384	SSTR5	424	WRN
	25	AXIN1	65	CDC73	105	DDX5	145	FGFR4	185	IKZF1	225	MAPK1	265	NOTCH2	305	PMS2	345	RNF2	385	STAG2	425	WT1
	26	AXIN2	66	CDH1	106	DICER1	146	FH	186	IL2RG	226	MAPK3	266	NOTCH3	306	POLD1	346	RNF43	386	STAT3	426	XPC
	27	AXL	67	CDH11	107	DNMT3A	147	FLCN	187	IL4R	227	MAPK4	267	NOTCH4	307	POLE	347	ROS1	387	STAT4	427	XPO1
	28	BAP1	68	CDH2	108	DOT1L	148	FLI1	188	INHBA	228	MAPK6	268	NRAS	308	POLE4	348	RPS6	388	STK11	428	XRCC2
	29	BARD1	69	CDH5	109	EGFR	149	FLT1	189	INPP4B	229	MAPK7	269	NRG1	309	POLR2A	349	RPS6KA2	389	STK36	429	XRCC5
	30	BCL11A	70	CDK1	110	EML4	150	FLT3	190	IRF2	230	MAPK8	270	NSD1	310	PPARG	350	RPS6KB1	390	SUFU	430	XRCC6
	31	BCL11B	71	CDK12	111	EMSY	151	FLT4	191	IRF4	231	MBD1	271	NTRK1	311	PPP2R1A	351	RPTOR	391	TAF1	431	ZFHX3
	32	BCL2	72	CDK2	112	EP300	152	FOXA1	192	IRS2	232	MCL1	272	NTRK2	312	PPP6C	352	RUNX1	392	TCF7L1	432	ZNF217
	33	BCL2L1	73	CDK4	113	EPCAM	153	FOXO1	193	JAK1	233	MDM2	273	NTRK3	313	PRDM1	353	RUNX1T1	393	TCF7L2	433	ZNF384
	34	BCL6	74	CDK5	114	EPHA2	154	FOXP1	194	JAK2	234	MDM4	274	NUP214	314	PREX2	354	RYR1	394	TEK	434	ZNF521
	35	BCL9	75	CDK6	115	EPHA3	155	FRS2	195	JUN	235	MED12	275	PAK3	315	PRKAR1A	355	SCN8A	395	TERT	435	ZNF703
	36	BCOR	76	CDK7	116	EPHA5	156	GATA2	196	KDM5A	236	MEF2B	276	PALB2	316	PRKCI	356	SDHA	396	TET2
	37	BCORL1	77	CDK8	117	EPHA7	157	GATA3	197	KDM5C	237	MEN1	277	PARK2	317	PRKDC	357	SDHB	397	TFE3
	38	BIRC2	78	CDK9	118	EPHB1	158	GATA4	198	KDM6A	238	MET	278	PARP1	318	PRSS1	358	SDHC	398	TGFB2
	39	BIRC3	79	CDKN1A	119	EPHB6	159	GATA6	199	KDR	239	MITF	279	PAX3	319	PTCH1	359	SDHD	399	TGFBR2
	40	BLM	80	CDKN1B	120	ERBB2	160	GLI1	200	KEAP1	240	MLH1	280	PAX7	320	PTEN	360	SETD2	400	TMPRSS2
	Bold gene symbol indicates 69 druggable genes for FDA approved targeted therapies.
